# Supplementary material for: The upregulation of circFoxp1 influences keloid by promoting cell proliferation
Source: publisher site journal article supplement (doi:10.18632/aging.205215), 2023-11-21
Supplement: Supplementary file [file aging-v15i22-205215-supplementary-material-SD1.pdf]

## SUPPLEMENTARY TABLES

**Supplementary Table 1. Primer used for QPCR analysis.**

| <b>Name</b>      | <b>Forward primer (5'-&gt;3')</b> | <b>Reverse primer (5'-&gt;3')</b> |
|------------------|-----------------------------------|-----------------------------------|
| hsa_circ_0001320 | TGAGGAGCACCCCATAGC                | CATCATAGCCACTGACACGG              |
| FOXP1            | AAGTTTGTCCCATGAGGAGC              | CTGGAGGATCTGCTGCATTT              |
| IL-6             | ACTCACCTCTTCAGAACGAATTG           | CCATCTTTGGAAGGTTTCAGGTTG          |
| TNF-a            | CCTCTCTCTAATCAGCCCTCTG            | GAGGACCTGGGAGTAGATGAG             |
| Col3a1           | TGCTGCTGGTACTCCTGGTCTG            | ACCTGGACCGCCTGGTTCAC              |
| Acta2            | GTGTTGCCCTGAAGAGCAT               | GCTGGGACATTGAAAGTCTCA             |
| Col1a1           | GAGGGCCAAGACGAAGACATC             | CAGATCACGTCATCGCACAAAC            |
| CD44             | CTGCCGCTTTGCAGGTGTA               | CATTGTGGGCAAGGTGCTATT             |
| Ki67             | ACGCTGGTTACTATCAAAAGG             | CAGACCCATTTACTTGTGTTGGA           |
| GAPDH            | TCGACAGTCAGCCGCATCTTCTTT          | ACCAAATCCGTTGACTCCGACCTT          |

**Supplementary Table 2. Primer used for RNA pulldown.**

| <b>Name</b>      | <b>Positive-probe-biotin</b> | <b>Negative-probe-biotin</b> |
|------------------|------------------------------|------------------------------|
| hsa_circ_0001320 | ACACGGGAACCTTAGAAATG         | CATTTCTAAAGTTCCCGTGT         |
